# Supplementary material for: Research on the environmental stability performance of chromite ore processing residue solidified products
Source: Royal Society of Chemistry journal article supplement (doi:10.1039/d3ra06820j), 2024-01-01
Supplement: d3ra06820j1.pdf [file d3ra06820j1.pdf]

# Supplementary Material

## Research on Environmental Stability Performance of Chromite Ore Processing Residue Solidified Products

Ming Xia <sup>a,b,c\*</sup>, Pengyue Su <sup>a</sup>, Hao Wang <sup>a</sup>, Huicheng Lu <sup>a</sup>, Haiyu Chen <sup>a</sup>, Shujie Zhao <sup>d\*</sup>,

Dongwei Li <sup>e\*</sup>

<sup>a</sup> School of Environmental and Chemical Engineering, Jiangsu Ocean University, Lianyungang,  
222005, China

<sup>b</sup> Jiangsu Institute of Marine Resources Development, Jiangsu Ocean University, Lianyungang,  
222005, China

<sup>c</sup> Jiangsu Key Laboratory of Function Control Technology for Advanced Materials, Jiangsu Ocean  
University, Lianyungang, 222005, China

<sup>d</sup> School of Safety Science and Engineering, Anhui University of Science and Technology,  
Huainan, 232001, China

<sup>e</sup> State Key Laboratory of Coal Mine Disaster Dynamics and Control, Chongqing University,  
Chongqing, 400044, China

\*E-mail: [xiaming@jou.edu.cn](mailto:xiaming@jou.edu.cn) (M. Xia); [zsj9506@163.com](mailto:zsj9506@163.com) (SJ. Zhao); [lironwei@cqu.edu.cn](mailto:lironwei@cqu.edu.cn)

(DW. Li).

## **Contents**

**Fig. S1.** The particle size distribution of COPR.

**Fig. S2.** The SEM image of COPR.

**Fig. S3.** The SEM image of BFS.

**Fig. S4.** The XRD pattern of COPR.

**Fig. S5.** The FTIR spectra of COPR.

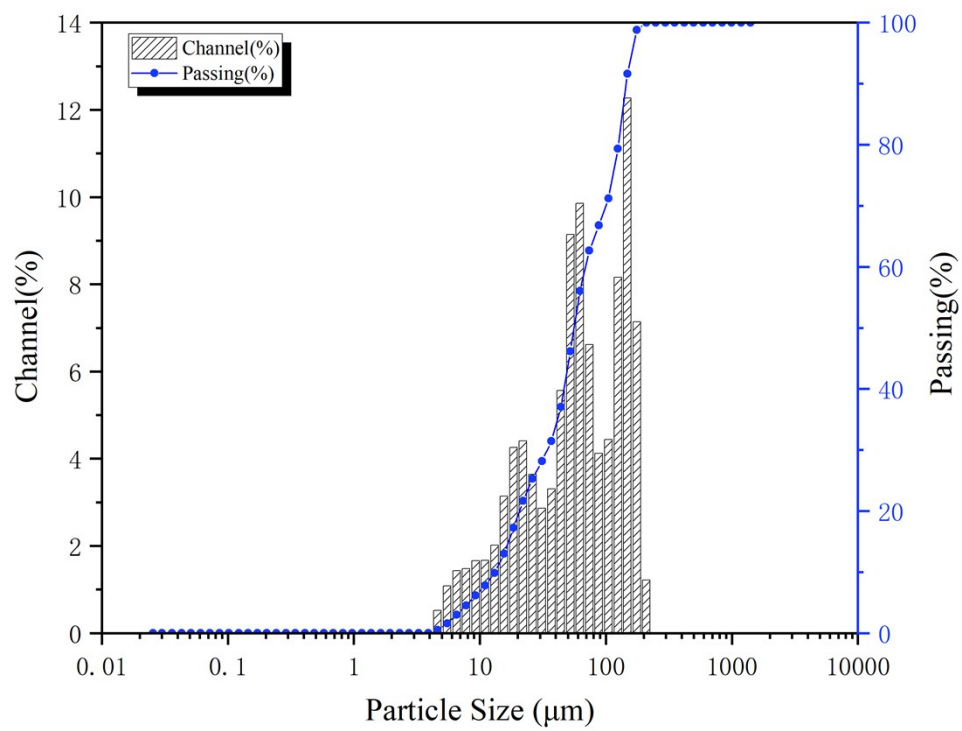

**Fig. S1.** The particle size distribution of COPR.

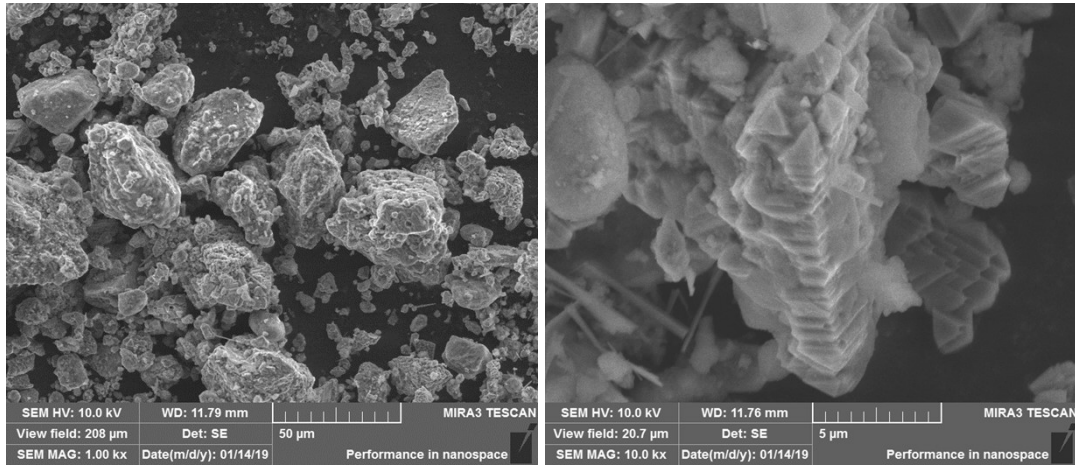

**Fig. S2.** The SEM image of COPR.

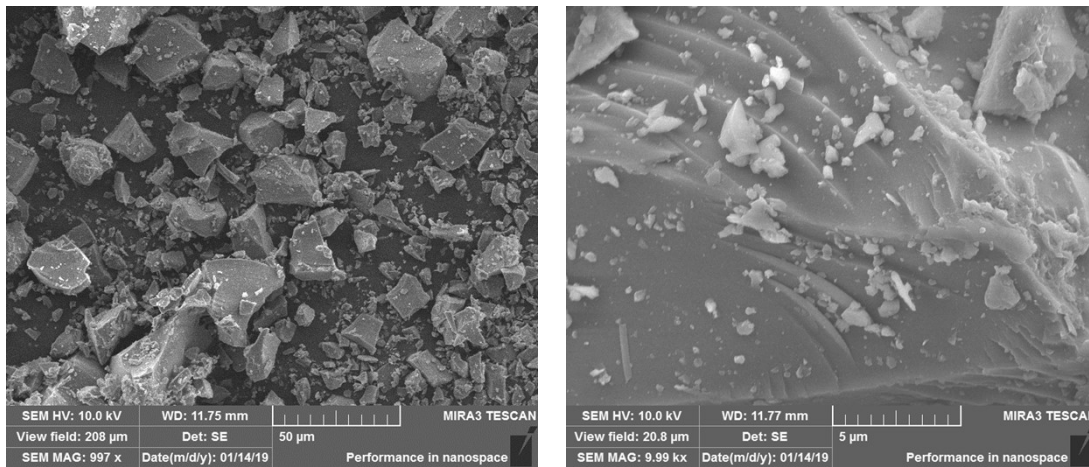

**Fig. S3.** The SEM image of BFS.

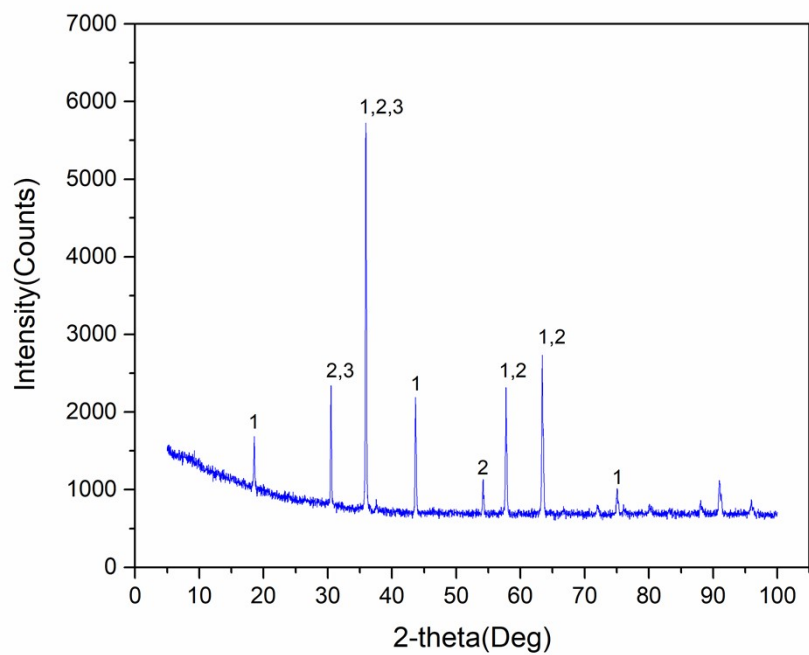

**Fig. S4.** The XRD patterns of COPR.

1: magnesiochromite, ferroan ( $(\text{Mg}, \text{Fe})(\text{Cr}, \text{Al})_2\text{O}_4$ ), PDF: 09-0353; 2: magnesium alumilium iron oxide ( $\text{MgAl}_{1.8}\text{Fe}_{1.2}\text{O}_4$ ), PDF: 71-1235; 3: magnesium chromium oxide ( $\text{MgCr}_2\text{O}_4$ ), PDF: 77-0007.

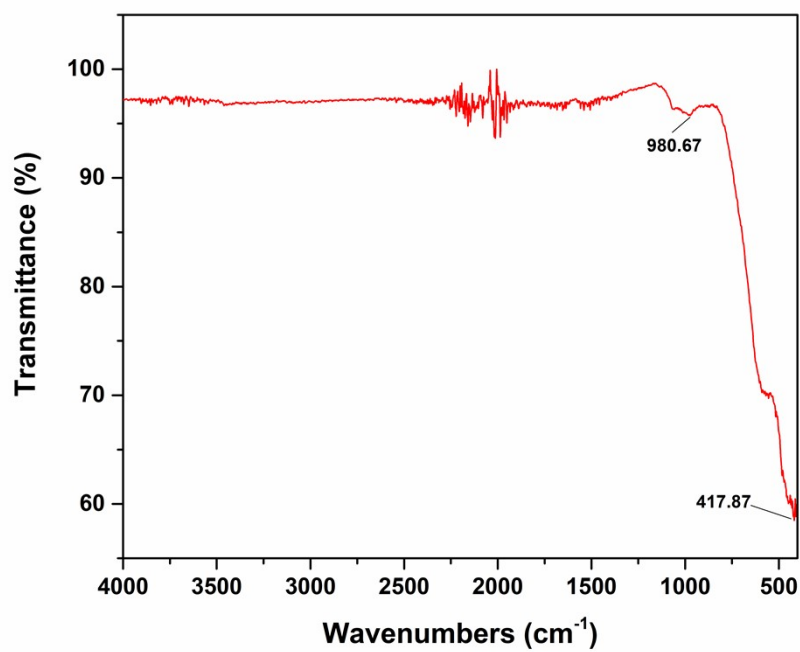

**Fig. S5.** The FTIR spectra of COPR.
